# Supplementary material
Source: PubMed Central journal article supplement (PMC2854329)

**Figure Appendix 1** Flow chart of the study

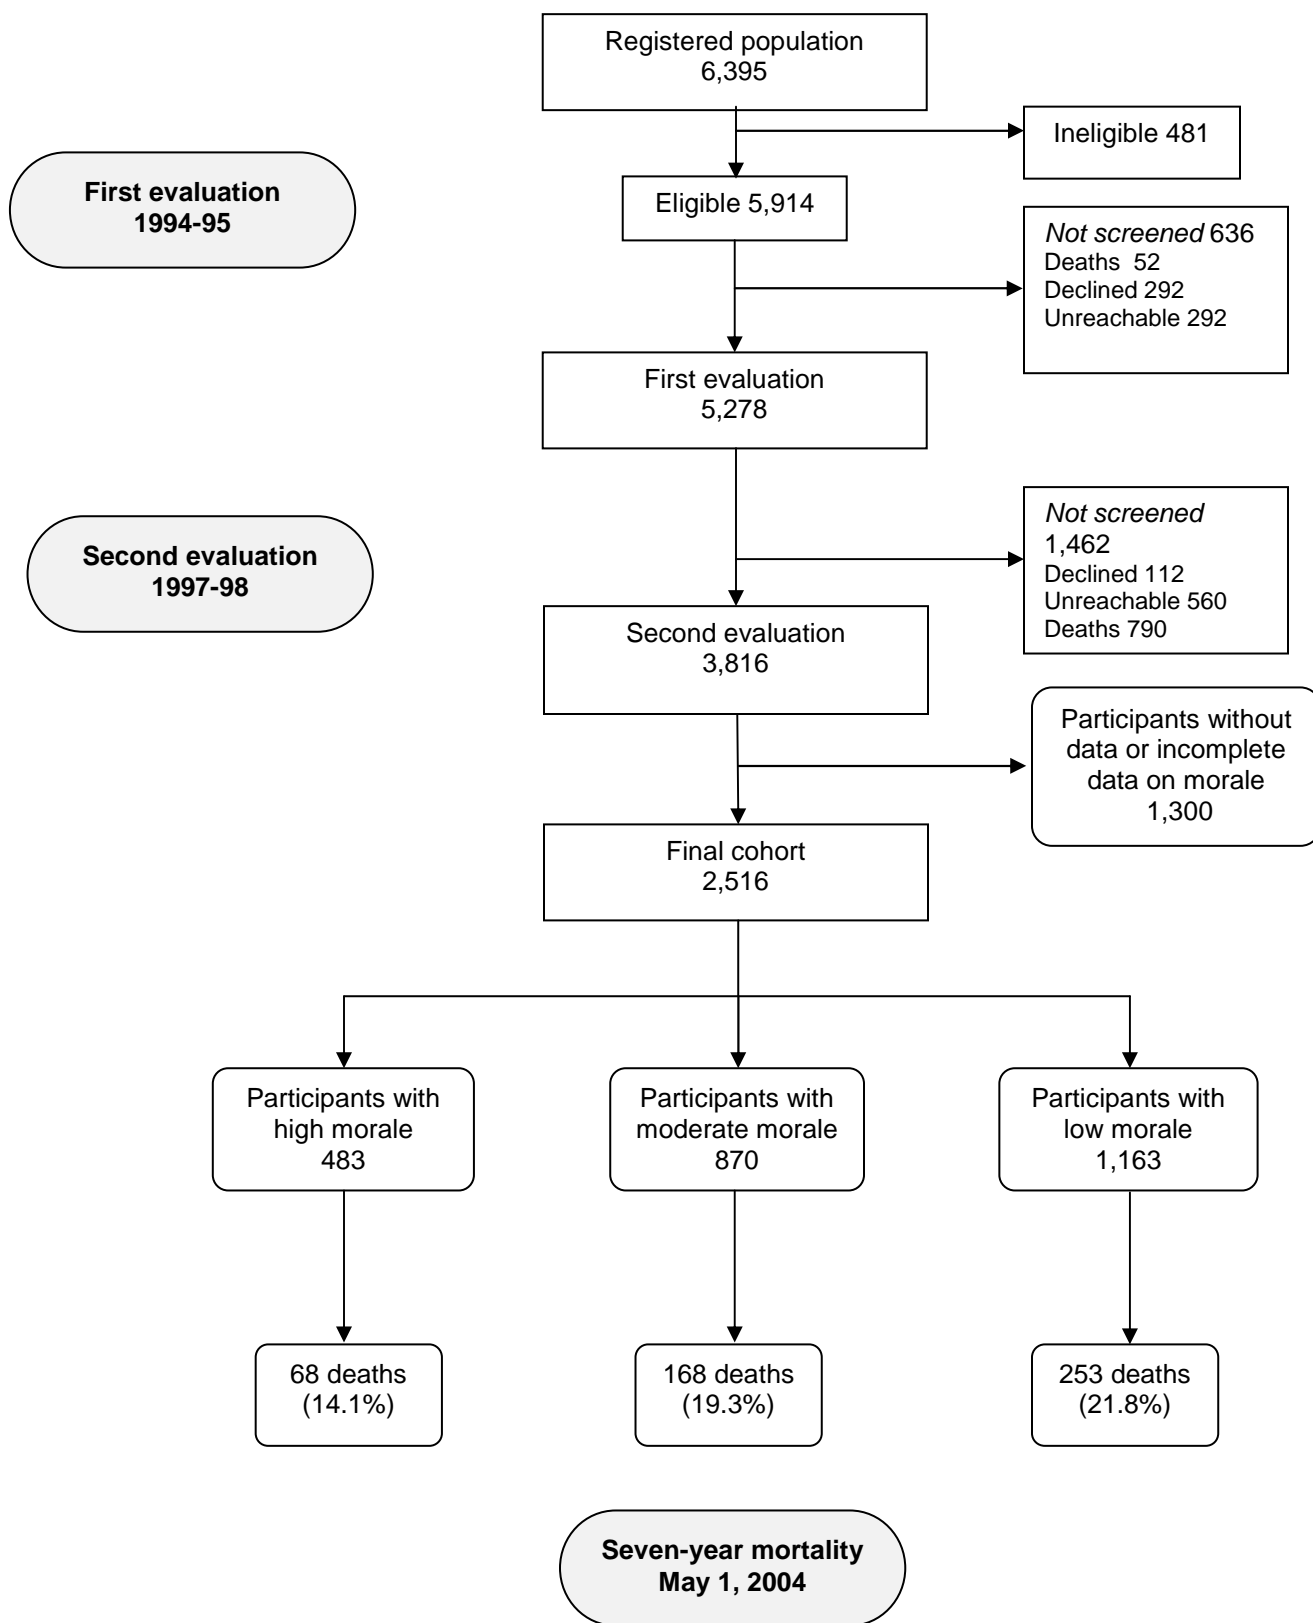

**Figure Appendix 2** Kaplan–Meier curves of time to death for participants with low morale scores, moderate scores, and high scores

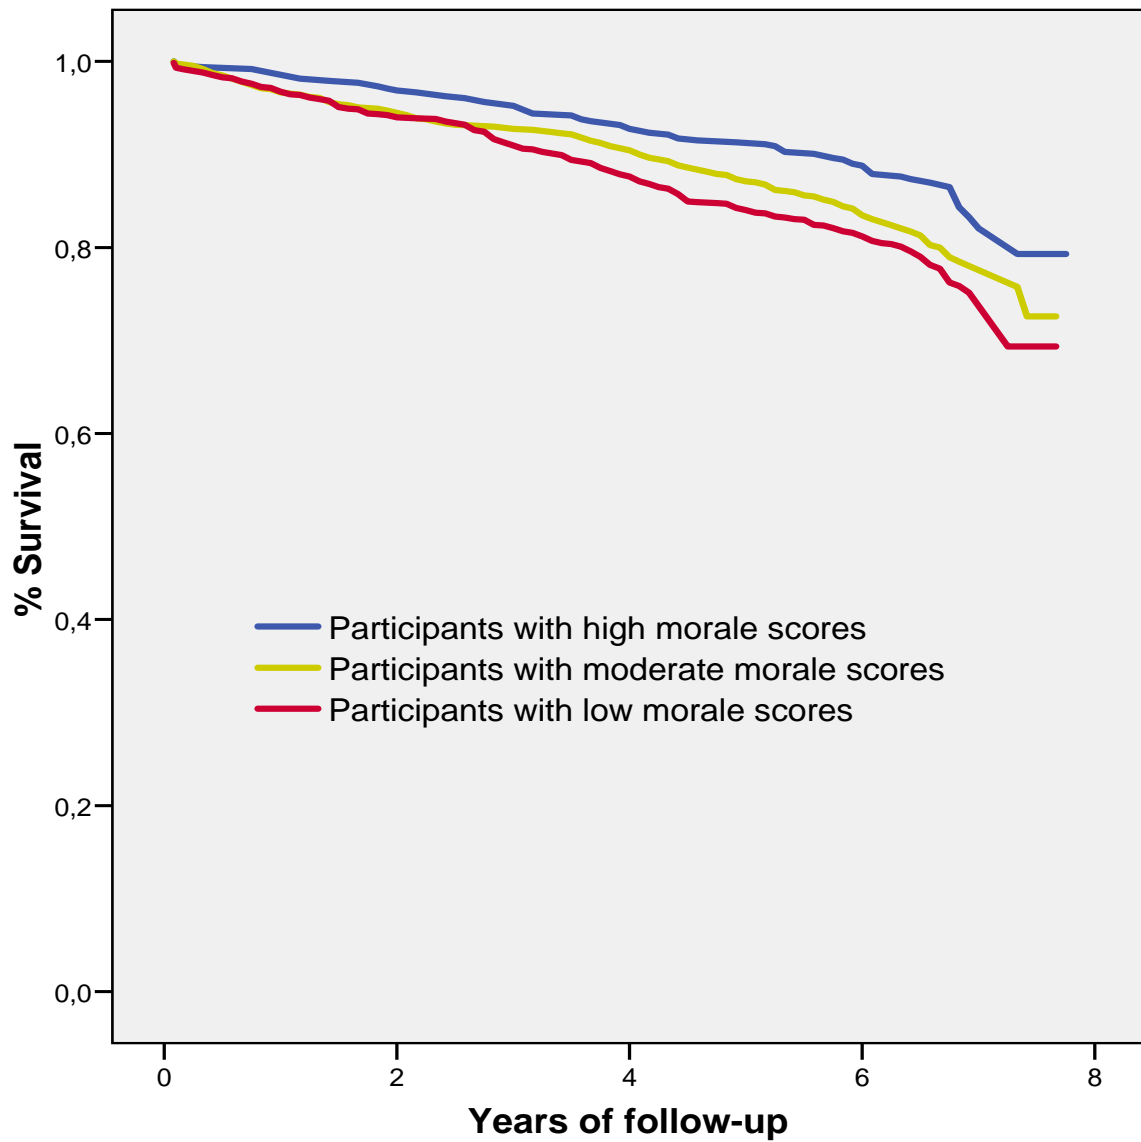

Supplement: afq028_1.pdf [file afq028_1.pdf]
